# Supplementary material for: Fibrinogen as a Pleiotropic Protein Causing Human Diseases: The Mutational Burden of Aα, Bβ, and γ Chains
Source: PubMed Central journal article supplement (PMC5751312; doi:10.3390/ijms18122711), 2017-12-14
Supplement: ijms-18-02711-s001.pdf [file ijms-18-02711-s001.pdf]

# Supplementary Material

Article

## Fibrinogen as a Pleiotropic Protein Causing Human Diseases: The Mutational Burden of A $\alpha$ , B $\beta$ , and $\gamma$ Chains

Elvezia Maria Paraboschi <sup>1</sup>, Stefano Duga <sup>1,2</sup> and Rosanna Asselta <sup>1,2,\*</sup>

<sup>1</sup> Department of Biomedical Sciences, Humanitas University, Via Rita Levi Montalcini 4, 20090 Pieve Emanuele, Milan, Italy; elvezia\_maria.paraboschi@hunimed.eu (E.M.P.); stefano.duga@hunimed.eu (S.D.)

<sup>2</sup> Humanitas Clinical and Research Center, Via Manzoni 56, 20089 Rozzano, Milan, Italy

\* Correspondence: rosanna.asselta@hunimed.eu; Tel.: +39-2-8224-5215

### List of contents:

- Supplementary table 1: Null frameshift and nonsense mutations present in the gnomAD database.
- Supplementary table 2: Missense/splicing/inframe-indels mutations consistently predicted as dangerous by prediction programs.
- Supplementary table 3. Mutational burden of the fibrinogen gene cluster in the Italian population.
- Supplementary Table 4. Estimated prevalence of autosomal-dominant fibrinogen disorders by ethnicity excluding the frequent p.Ala108Gly mutation.

**Supplementary Table 1.** Null frameshift and nonsense mutations present in the gnomAD database.

| Gene        | RefSeqID         | Genomic position <sup>1</sup> | cDNA level               | Native protein     |
|-------------|------------------|-------------------------------|--------------------------|--------------------|
| FGA         | -                | Chr4:155,510,678              | c.91G>T                  | p.Gly31Ter         |
|             | -                | Chr4:155,510,591              | c.177delC                | p.Trp60GlyfsTer11  |
|             | rs767657961      | Chr4:155,510,037              | c.272C>A                 | p.Ser91Ter         |
|             | -                | Chr4:155,509,956              | c.352delT                | p.Ser118ProfsTer17 |
|             | -                | Chr4:155,508,799              | c.374delA                | p.Asn125IlefsTer10 |
|             | rs770680765      | Chr4:155,508,686              | c.488T>A                 | p.Leu163Ter        |
|             | rs764043296      | Chr4:155,507,999              | c.581dupT                | p.Lys195GlufsTer4  |
|             | rs776817952      | Chr4:155,507,659              | c.922C>T                 | p.Arg308Ter        |
|             | rs752823417      | Chr4:155,507,490              | c.1086_1090delTGGCA      | p.Gly363LeufsTer2  |
|             | -                | Chr4:155,507,428              | c.1153C>T                | p.Gln385Ter        |
|             | rs767571876      | Chr4:155,507,362              | c.1215_1218dupTAAC       | p.Asn407Ter        |
|             | rs759819642      | Chr4:155,507,299              | c.1280_1281dupAG         | p.Tyr428SerfsTer57 |
|             | rs774564301      | Chr4:155,507,283              | c.1288_1297delACAGAAAAAC | p.Thr430TrpfsTer51 |
|             | -                | Chr4:155,507,054              | c.1526dupT               | p.Arg510ProfsTer3  |
|             | rs4766           | Chr4:155,507,039              | c.1541delC               | p.Pro514LeufsTer24 |
|             | -                | Chr4:155,506,953              | c.1626_1627delTG         | p.Ser542ArgfsTer3  |
|             | rs773619297      | Chr4:155,506,927              | c.1653delT               | p.Gly552AlafsTer16 |
|             | -                | Chr4:155,506,917              | c.1663dupA               | p.Thr555AsnfsTer15 |
| rs750277272 | Chr4:155,506,851 | c.1730C>G                     | p.Ser577Ter              |                    |
| rs770461175 | Chr4:155,506,844 | c.1736dupA                    | p.Tyr579Ter              |                    |
| -           | Chr4:155,506,693 | c.1888A>T                     | p.Arg630Ter              |                    |
| FGB         | -                | Chr4:155,487,776              | c.443delT                | p.Met148SerfsTer4  |
|             | -                | Chr4:155,488,826              | c.575delC                | p.Pro192GlnfsTer14 |
|             | -                | Chr4:155,488,923              | c.669T>A                 | p.Cys223Ter        |
|             | rs775981072      | Chr4:155,490,357              | c.856C>T                 | p.Gln286Ter        |
|             | -                | Chr4:155,490,754              | c.1048delG               | p.Asp350ThrfsTer3  |
|             | rs547765642      | Chr4:155,490,757              | c.1055_1059delTAAAG      | p.Val352GlyfsTer11 |
| FGG         | rs778213856      | Chr4:155,533,224              | c.253C>T                 | p.Gln85Ter         |
|             | -                | Chr4:155,533,022              | c.335_336insTCAACATAAT   | p.Arg113GlnfsTer14 |
|             | -                | Chr4:155,532,999              | c.358delA                | p.Met120Ter        |
|             | rs750923281      | Chr4:155,530,878              | c.568_569delAG           | p.Ser190ArgfsTer6  |
|             | rs768694513      | Chr4:155,530,797              | c.651G>A                 | p.Trp217Ter        |
|             | -                | Chr4:155,529,686              | c.782dupT                | p.Leu261PhefsTer36 |
|             | -                | Chr4:155,528,073              | c.906_912dupAACATAT      | p.Ala305AsnfsTer15 |
| -           | Chr4:155,527,860 | c.1126C>T                     | p.Gln376Ter              |                    |

These mutations appear in the gnomAD database in at least 1 individual; none of them has been described in fibrinogen-related databases. <sup>1</sup>Numbering according to UCSC Genome browser, human assembly, February 2009 (GRCh37/hg19).

**Supplementary Table 2.** Missense/splicing/inframe-indels mutations consistently predicted as dangerous by prediction programs.

| Gene        | RefSeqID         | Genomic position <sup>1</sup> | cDNA level  | Native protein |
|-------------|------------------|-------------------------------|-------------|----------------|
| FGA         | rs151016432      | Chr4:155,508,036              | c.545G>C    | p.Gly182Ala    |
|             | rs754195439      | Chr4:155,508,048              | c.533G>C    | p.Arg178Pro    |
|             | rs754195439      | Chr4:155,508,048              | c.533G>A    | p.Arg178Gln    |
|             | -                | Chr4:155,508,053              | c.528G>C    | p.Lys176Asn    |
|             | -                | Chr4:155,508,054              | c.527A>T    | p.Lys176Met    |
|             | rs780068895      | Chr4:155,508,065              | c.516C>G    | p.Asp172Glu    |
|             | rs748106542      | Chr4:155,508,067              | c.514G>A    | p.Asp172Asn    |
|             | rs780339572      | Chr4:155,508,665              | c.509A>T    | p.Glu170Val    |
|             | -                | Chr4:155,508,666              | c.508G>C    | p.Glu170Gln    |
|             | rs771565963      | Chr4:155,508,706              | c.468G>T    | p.Gln156His    |
|             | rs765688392      | Chr4:155,508,740              | c.434T>C    | p.Val145Ala    |
|             | rs147888314      | Chr4:155,508,771              | c.403A>G    | p.Arg135Gly    |
|             | rs747854049      | Chr4:155,510,070              | c.239A>G    | p.Asp80Gly     |
|             | -                | Chr4:155,510,071              | c.238G>T    | p.Asp80Tyr     |
|             | rs749744029      | Chr4:155,510,095              | c.214G>C    | p.Gly72Arg     |
|             | -                | Chr4:155,510,115              | c.194C>A    | p.Pro65His     |
|             | -                | Chr4:155,510,593              | c.176A>G    | p.Asp59Gly     |
|             | rs765285466      | Chr4:155,510,599              | c.170A>G    | p.Asp57Gly     |
|             | -                | Chr4:155,510,615              | c.154T>C    | p.Trp52Arg     |
|             | -                | Chr4:155,510,615              | c.154T>A    | p.Trp52Arg     |
| rs753733924 | Chr4:155,509,937 | c.364+4_364+7delAGTA          | -           |                |
| rs752713439 | Chr4:155,509,941 | c.364+4A>G                    | -           |                |
| FGB         | rs765627047      | Chr4:155,487,117              | c.272A>T    | p.Asp91Val     |
|             | rs774502903      | Chr4:155,487,641              | c.307G>A    | p.Gly103Arg    |
|             | -                | Chr4:155,487,648              | c.314T>C    | p.Leu105Ser    |
|             | rs779413540      | Chr4:155,487,669              | c.335T>C    | p.Leu112Ser    |
|             | rs530036524      | Chr4:155,488,841              | c.587G>A    | p.Arg196His    |
|             | -                | Chr4:155,488,843              | c.589G>A    | p.Val197Met    |
|             | rs747314723      | Chr4:155,488,849              | c.595C>T    | p.Arg199Cys    |
|             | -                | Chr4:155,488,799              | c.545A>G    | p.Tyr182Cys    |
|             | rs548206997      | Chr4:155,488,850              | c.596G>A    | p.Arg199His    |
|             | rs758583316      | Chr4:155,488,878              | c.624A>C    | p.Lys208Asn    |
|             | rs538708636      | Chr4:155,488,880              | c.626T>C    | p.Ile209Thr    |
|             | rs765701687      | Chr4:155,488,952              | c.698T>G    | p.Ile233Ser    |
|             | rs750327950      | Chr4:155,489,578              | c.764A>G    | p.Tyr255Cys    |
|             | rs758467916      | Chr4:155,489,584              | c.770T>C    | p.Ile257Thr    |
|             | -                | Chr4:155,489,622              | c.808T>C    | p.Cys270Arg    |
|             | rs771406104      | Chr4:155,490,343              | c.842T>C    | p.Val281Ala    |
|             | -                | Chr4:155,490,347              | c.846T>G    | p.Ile282Met    |
|             | rs368867072      | Chr4:155,490,686              | c.979G>T    | p.Asp327Tyr    |
|             | rs766420576      | Chr4:155,490,732              | c.1025T>C   | p.Ile342Thr    |
|             | rs751610009      | Chr4:155,490,733              | c.1026A>G   | p.Ile342Met    |
|             | rs150330219      | Chr4:155,490,738              | c.1031T>C   | p.Met344Thr    |
|             | rs761339656      | Chr4:155,490,752              | c.1045G>A   | p.Gly349Arg    |
|             | rs764989450      | Chr4:155,490,753              | c.1046G>C   | p.Gly349Ala    |
|             | -                | Chr4:155,490,782              | c.1075T>C   | p.Phe359Leu    |
|             | rs764970021      | Chr4:155,490,845              | c.1138G>A   | p.Gly380Ser    |
|             | rs762523152      | Chr4:155,490,854              | c.1147C>G   | p.Leu383Val    |
| rs754035448 | Chr4:155,490,906 | c.1199A>C                     | p.His400Pro |                |

|     |             |                  |                   |             |
|-----|-------------|------------------|-------------------|-------------|
|     | -           | Chr4:155,490,912 | c.1205G>T         | p.Gly402Val |
|     | -           | Chr4:155,490,933 | c.1226A>G         | p.Asp409Gly |
|     | rs776578431 | Chr4:155,490,941 | c.1234A>T         | p.Asn412Tyr |
|     | -           | Chr4:155,490,942 | c.1235A>G         | p.Asn412Ser |
|     | -           | Chr4:155,491,623 | c.1297T>A         | p.Trp433Arg |
|     | rs764555923 | Chr4:155,491,635 | c.1309T>C         | p.Cys437Arg |
|     | rs765571602 | Chr4:155,491,770 | c.1444A>G         | p.Met482Val |
|     | rs769690072 | Chr4:155,491,568 | c.1245-3C>G       | -           |
|     | rs746473186 | Chr4:155,526,080 | c.1265_1267delAAG | p.Glu422del |
|     | rs776109029 | Chr4:155,526,108 | c.1240C>A         | p.Pro414Thr |
|     | -           | Chr4:155,527,954 | c.1032C>A         | p.Asp344Glu |
|     | rs746474853 | Chr4:155,528,014 | c.972T>A          | p.Asp324Glu |
|     | rs777248925 | Chr4:155,528,022 | c.964G>A          | p.Gly322Ser |
|     | rs765095457 | Chr4:155,528,106 | c.880G>A          | p.Gly294Arg |
|     | rs750162680 | Chr4:155,528,109 | c.877G>A          | p.Val293Met |
|     | rs376120251 | Chr4:155,529,690 | c.779A>G          | p.His260Arg |
|     | rs757602733 | Chr4:155,529,699 | c.770A>C          | p.Glu257Ala |
|     | -           | Chr4:155,529,717 | c.752A>G          | p.Glu251Gly |
|     | -           | Chr4:155,529,720 | c.749C>T          | p.Thr250Ile |
|     | rs145051028 | Chr4:155,529,735 | c.734C>T          | p.Ser245Phe |
|     | rs372737021 | Chr4:155,529,789 | c.680G>A          | p.Ser227Asn |
|     | rs758757675 | Chr4:155,530,784 | c.664A>G          | p.Lys222Glu |
| FGG | rs747416023 | Chr4:155,530,795 | c.653C>T          | p.Thr218Ile |
|     | rs781597393 | Chr4:155,530,799 | c.649T>G          | p.Trp217Gly |
|     | rs771885312 | Chr4:155,530,823 | c.625G>A          | p.Glu209Lys |
|     | rs776288074 | Chr4:155,530,871 | c.577T>C          | p.Tyr193His |
|     | -           | Chr4:155,530,879 | c.569G>T          | p.Ser190Ile |
|     | rs868267949 | Chr4:155,530,912 | c.536G>T          | p.Cys179Phe |
|     | rs371692602 | Chr4:155,531,248 | c.503C>T          | p.Thr168Met |
|     | -           | Chr4:155,531,344 | c.407T>G          | p.Leu136Trp |
|     | -           | Chr4:155,533,331 | c.146G>C          | p.Cys49Ser  |
|     | -           | Chr4:155,533,334 | c.143C>T          | p.Thr48Ile  |
|     | rs202132393 | Chr4:155,533,353 | c.124G>T          | p.Gly42Cys  |
|     | -           | Chr4:155,533,566 | c.100T>G          | p.Cys34Gly  |
|     | -           | Chr4:155,532,952 | c.401+5G>A        | -           |
|     | rs556828126 | Chr4:155,533,680 | c.78+4A>G         | -           |

These mutations appear in the gnomAD database in at least 1 individual; none of them has been described in fibrinogen-related databases; they were predicted as deleterious by 7 of 7 prediction software (in the case of missense or in-frame indels) or 3 of 3 (in case of splicing mutations). <sup>1</sup>Numbering according to UCSC Genome browser, human assembly, February 2009 (GRCh37/hg19).

**Supplementary Table 3.** Mutational burden of the fibrinogen gene cluster in the Italian population.

| Gene (prevalence)     | RefSeqID    | Genomic position <sup>1</sup> | Native protein    | Number of Italians carrying the identified mutation | Present in fibrinogen-related databases |
|-----------------------|-------------|-------------------------------|-------------------|-----------------------------------------------------|-----------------------------------------|
| <i>FGA</i><br>(0.082) | -           | 155,510,651                   | p.Val40TrpfsTer31 | 1                                                   | a                                       |
| <i>FGB</i><br>(0.33)  | -           | 155,490,343                   | p.Val281Ala       | 1                                                   | -                                       |
|                       | -           | 155,490,752                   | p.Gly349Arg       | 1                                                   | -                                       |
| <i>FGG</i><br>(36)    | -           | 155,529,674                   | p.Gln265His       | 2                                                   | d                                       |
|                       | -           | 155,529,760                   | p.Tyr237His       | 1                                                   | h                                       |
|                       | -           | 155,530,795                   | p.Thr218Ile       | 1                                                   | -                                       |
|                       | -           | 155,531,248                   | p.Thr168Met       | 2                                                   | -                                       |
|                       | rs148685782 | 155,533,035                   | p.Ala108Gly       | 15                                                  | h                                       |
|                       | rs138511699 | 155,533,337                   | p.Thr47Ile        | 2                                                   | h                                       |
| -                     | 155,533,353 | p.Gly42Ser                    | 5                 | d                                                   |                                         |

The prevalence of recessively-inherited fibrinogen disorders is reported in brackets below the relevant gene (for million people); the cumulative prevalence corresponds to 36.4 in 10<sup>6</sup>; for these calculations, mutations reported in fibrinogen-related databases as cause of dysfibrinogenemia (d) or amyloidosis (m) were not included; a, afibrinogenemia; h, hypofibrinogenemia. Missense variants not reported in fibrinogen-related databases were predicted as deleterious by 7 of 7 prediction software. <sup>1</sup>Numbering according to UCSC Genome browser, human assembly, February 2009 (GRCh37/hg19).

**Supplementary Table 4.** Estimated prevalence of autosomal-dominant fibrinogen disorders by ethnicity excluding the frequent p.Ala108Gly mutation.

| <b>Population</b>              | <b>Total number of alleles <sup>1</sup></b> | <b>Total number of variants</b> | <b>Collective frequency of variants</b> | <b>Heterozygote frequency</b> | <b>Prevalence in 10<sup>3</sup> individuals</b> |
|--------------------------------|---------------------------------------------|---------------------------------|-----------------------------------------|-------------------------------|-------------------------------------------------|
| <b>ALL</b>                     | 277,144                                     | 826                             | 0.0030                                  | 0.0060                        | 6                                               |
| Africans and African Americans | 24,036                                      | 134                             | 0.0056                                  | 0.011                         | 11                                              |
| Admixed Americans              | 34,418                                      | 136                             | 0.0040                                  | 0.0080                        | 8                                               |
| Ashkenazi Jewish               | 10,152                                      | 19                              | 0.0019                                  | 0.0037                        | 4                                               |
| East Asians                    | 18,868                                      | 33                              | 0.0017                                  | 0.0035                        | 3                                               |
| Finnish                        | 25,794                                      | 15                              | 0.0006                                  | 0.0012                        | 1                                               |
| Non-Finnish Europeans          | 126,646                                     | 389                             | 0,0031                                  | 0.0060                        | 6                                               |
| South Asians                   | 30,782                                      | 78                              | 0.0025                                  | 0.0051                        | 5                                               |
| Other ethnicities              | 6,466                                       | 22                              | 0.0034                                  | 0.0068                        | 7                                               |

Carrier rates were estimated using the gnomAD database, including all null mutations, plus missense variants predicted to be deleterious by 7 of 7 prediction software, plus splicing defects located at intronic positions -3 and +3/+6 and predicted as disrupting by 3 of 3 algorithms (see Materials and Methods). The p.Ala108Gly mutation has been excluded from this analysis. <sup>1</sup>Discrepancies in the number of alleles are due to slight differences in the number of individuals successfully sequenced for each specific region.
